# Supplementary material for: Rehabilitation Interventions for Post-Acute COVID-19 Syndrome: A Systematic Review
Source: MDPI journal article supplement (doi:10.3390/ijerph19095185), 2022-04-24
Supplement: s1 [file s1]

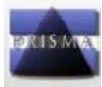

## File S1 - PRISMA 2020 Checklist

| Section and Topic             | Item # | Checklist item                                                                                                                                                                                                                                                                                       | Location where item is reported        |
|-------------------------------|--------|------------------------------------------------------------------------------------------------------------------------------------------------------------------------------------------------------------------------------------------------------------------------------------------------------|----------------------------------------|
| <b>TITLE</b>                  |        |                                                                                                                                                                                                                                                                                                      |                                        |
| Title                         | 1      | Identify the report as a systematic review.                                                                                                                                                                                                                                                          | Title                                  |
| <b>ABSTRACT</b>               |        |                                                                                                                                                                                                                                                                                                      |                                        |
| Abstract                      | 2      | See the PRISMA 2020 for Abstracts checklist.                                                                                                                                                                                                                                                         | Abstract                               |
| <b>INTRODUCTION</b>           |        |                                                                                                                                                                                                                                                                                                      |                                        |
| Rationale                     | 3      | Describe the rationale for the review in the context of existing knowledge.                                                                                                                                                                                                                          | Page 2 Introduction                    |
| Objectives                    | 4      | Provide an explicit statement of the objective(s) or question(s) the review addresses.                                                                                                                                                                                                               | Page 3. Last paragraph of Introduction |
| <b>METHODS</b>                |        |                                                                                                                                                                                                                                                                                                      |                                        |
| Eligibility criteria          | 5      | Specify the inclusion and exclusion criteria for the review and how studies were grouped for the syntheses.                                                                                                                                                                                          | Page 3, Materials and Methods          |
| Information sources           | 6      | Specify all databases, registers, websites, organisations, reference lists and other sources searched or consulted to identify studies. Specify the date when each source was last searched or consulted.                                                                                            | Pages 3-4, Search strategy and File S2 |
| Search strategy               | 7      | Present the full search strategies for all databases, registers and websites, including any filters and limits used.                                                                                                                                                                                 | Appendix B                             |
| Selection process             | 8      | Specify the methods used to decide whether a study met the inclusion criteria of the review, including how many reviewers screened each record and each report retrieved, whether they worked independently, and if applicable, details of automation tools used in the process.                     | Page 4 Data collection and analysis    |
| Data collection process       | 9      | Specify the methods used to collect data from reports, including how many reviewers collected data from each report, whether they worked independently, any processes for obtaining or confirming data from study investigators, and if applicable, details of automation tools used in the process. | Page 4 Data extraction and management  |
| Data items                    | 10a    | List and define all outcomes for which data were sought. Specify whether all results that were compatible with each outcome domain in each study were sought (e.g. for all measures, time points, analyses), and if not, the methods used to decide which results to collect.                        | Page 4 Data extraction and management  |
|                               | 10b    | List and define all other variables for which data were sought (e.g. participant and intervention characteristics, funding sources). Describe any assumptions made about any missing or unclear information.                                                                                         | Page 4 Data extraction and management  |
| Study risk of bias assessment | 11     | Specify the methods used to assess risk of bias in the included studies, including details of the tool(s) used, how many reviewers assessed each study and whether they worked independently, and if applicable, details of automation tools used in the process.                                    | Page 4 Data extraction and management  |
| Effect measures               | 12     | Specify for each outcome the effect measure(s) (e.g. risk ratio, mean difference) used in the synthesis or presentation of results.                                                                                                                                                                  | Page 4 Data extraction and management  |

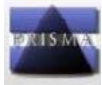

## File S1 - PRISMA 2020 Checklist

| Section and Topic             | Item # | Checklist item                                                                                                                                                                                                                                                                       | Location where item is reported                |
|-------------------------------|--------|--------------------------------------------------------------------------------------------------------------------------------------------------------------------------------------------------------------------------------------------------------------------------------------|------------------------------------------------|
| Synthesis methods             | 13a    | Describe the processes used to decide which studies were eligible for each synthesis (e.g. tabulating the study intervention characteristics and comparing against the planned groups for each synthesis (item #5)).                                                                 | Pages 4-5 Synthesis                            |
|                               | 13b    | Describe any methods required to prepare the data for presentation or synthesis, such as handling of missing summary statistics, or data conversions.                                                                                                                                | Pages 4-5 Synthesis                            |
|                               | 13c    | Describe any methods used to tabulate or visually display results of individual studies and syntheses.                                                                                                                                                                               | Pages 4-5 Synthesis                            |
|                               | 13d    | Describe any methods used to synthesize results and provide a rationale for the choice(s). If meta-analysis was performed, describe the model(s), method(s) to identify the presence and extent of statistical heterogeneity, and software package(s) used.                          | NA                                             |
|                               | 13e    | Describe any methods used to explore possible causes of heterogeneity among study results (e.g. subgroup analysis, meta-regression).                                                                                                                                                 | NA                                             |
|                               | 13f    | Describe any sensitivity analyses conducted to assess robustness of the synthesized results.                                                                                                                                                                                         | NA                                             |
| Reporting bias assessment     | 14     | Describe any methods used to assess risk of bias due to missing results in a synthesis (arising from reporting biases).                                                                                                                                                              | Page 4 Data extraction and management          |
| Certainty assessment          | 15     | Describe any methods used to assess certainty (or confidence) in the body of evidence for an outcome.                                                                                                                                                                                | NA                                             |
| <b>RESULTS</b>                |        |                                                                                                                                                                                                                                                                                      |                                                |
| Study selection               | 16a    | Describe the results of the search and selection process, from the number of records identified in the search to the number of studies included in the review, ideally using a flow diagram.                                                                                         | Figure 1                                       |
|                               | 16b    | Cite studies that might appear to meet the inclusion criteria, but which were excluded, and explain why they were excluded.                                                                                                                                                          | Figure 1                                       |
| Study characteristics         | 17     | Cite each included study and present its characteristics.                                                                                                                                                                                                                            | Page 5, Results, Study selection and Table 1   |
| Risk of bias in studies       | 18     | Present assessments of risk of bias for each included study.                                                                                                                                                                                                                         | Figure 2 and Pages 5-7, methodological quality |
| Results of individual studies | 19     | For all outcomes, present, for each study: (a) summary statistics for each group (where appropriate) and (b) an effect estimate and its precision (e.g. confidence/credible interval), ideally using structured tables or plots.                                                     | Tables 2 A-B-C                                 |
| Results of syntheses          | 20a    | For each synthesis, briefly summarise the characteristics and risk of bias among contributing studies.                                                                                                                                                                               | NA                                             |
|                               | 20b    | Present results of all statistical syntheses conducted. If meta-analysis was done, present for each the summary estimate and its precision (e.g. confidence/credible interval) and measures of statistical heterogeneity. If comparing groups, describe the direction of the effect. | NA                                             |
|                               | 20c    | Present results of all investigations of possible causes of heterogeneity among study results.                                                                                                                                                                                       | NA                                             |
|                               | 20d    | Present results of all sensitivity analyses conducted to assess the robustness of the synthesized results.                                                                                                                                                                           | NA                                             |
| Reporting biases              | 21     | Present assessments of risk of bias due to missing results (arising from reporting biases) for each synthesis assessed.                                                                                                                                                              | NA                                             |



## File S1 - PRISMA 2020 Checklist

| Section and Topic                              | Item # | Checklist item                                                                                                                                                                                                                             | Location where item is reported           |
|------------------------------------------------|--------|--------------------------------------------------------------------------------------------------------------------------------------------------------------------------------------------------------------------------------------------|-------------------------------------------|
| Certainty of evidence                          | 22     | Present assessments of certainty (or confidence) in the body of evidence for each outcome assessed.                                                                                                                                        | NA                                        |
| <b>DISCUSSION</b>                              |        |                                                                                                                                                                                                                                            |                                           |
| Discussion                                     | 23a    | Provide a general interpretation of the results in the context of other evidence.                                                                                                                                                          | Discussion Pages 18-20                    |
|                                                | 23b    | Discuss any limitations of the evidence included in the review.                                                                                                                                                                            | Discussion Pages 20-21                    |
|                                                | 23c    | Discuss any limitations of the review processes used.                                                                                                                                                                                      | Discussion Pages 20-21                    |
|                                                | 23d    | Discuss implications of the results for practice, policy, and future research.                                                                                                                                                             | Discussion Pages 19-21                    |
| <b>OTHER INFORMATION</b>                       |        |                                                                                                                                                                                                                                            |                                           |
| Registration and protocol                      | 24a    | Provide registration information for the review, including register name and registration number, or state that the review was not registered.                                                                                             | Abstract and Page 3, Material and Methods |
|                                                | 24b    | Indicate where the review protocol can be accessed, or state that a protocol was not prepared.                                                                                                                                             | Abstract and Page 3, Material and Methods |
|                                                | 24c    | Describe and explain any amendments to information provided at registration or in the protocol.                                                                                                                                            | NA                                        |
| Support                                        | 25     | Describe sources of financial or non-financial support for the review, and the role of the funders or sponsors in the review.                                                                                                              | Page 22 - Funding                         |
| Competing interests                            | 26     | Declare any competing interests of review authors.                                                                                                                                                                                         | Page 22 – Conflicts of Interest           |
| Availability of data, code and other materials | 27     | Report which of the following are publicly available and where they can be found: template data collection forms; data extracted from included studies; data used for all analyses; analytic code; any other materials used in the review. | Page 22 - Data Availability Statement     |

From: Page MJ, McKenzie JE, Bossuyt PM, Boutron I, Hoffmann TC, Mulrow CD, et al. The PRISMA 2020 statement: an updated guideline for reporting systematic reviews. BMJ 2021;372:n71. doi: 10.1136/bmj.n71 [For more information, visit: http://www.prisma-statement.org/](http://www.prisma-statement.org/)

**File S2: Search strings for all databases in the systematic review.**

| Database searched                                                                                | Search terms                                                                                                                                                                                                                                                                                                                                                                                                                                                                                                                                                                                                                                                                                                                                                                                                                                                                                                                                                                                                                                                                                                                                                                                                                                                                                                                                                                                                                                                                                                                                                                                                                                            |
|--------------------------------------------------------------------------------------------------|---------------------------------------------------------------------------------------------------------------------------------------------------------------------------------------------------------------------------------------------------------------------------------------------------------------------------------------------------------------------------------------------------------------------------------------------------------------------------------------------------------------------------------------------------------------------------------------------------------------------------------------------------------------------------------------------------------------------------------------------------------------------------------------------------------------------------------------------------------------------------------------------------------------------------------------------------------------------------------------------------------------------------------------------------------------------------------------------------------------------------------------------------------------------------------------------------------------------------------------------------------------------------------------------------------------------------------------------------------------------------------------------------------------------------------------------------------------------------------------------------------------------------------------------------------------------------------------------------------------------------------------------------------|
| <b>Medline, Embase, Cochrane Register of Controlled Trials, CINHALL, Scopus, Prospero, PEDro</b> | <p>(“long COVID” OR “chronic COVID syndrome” OR “chronic COVID-19” OR “COVID long-hauler” OR “COVID-19 long-hauler” OR “long haul COVID” OR “long hauler COVID” OR “post COVID 19 fatigue” OR “post COVID 19 neurological syndrome” OR “post COVID 19 syndrome” OR “post COVID fatigue” OR “post COVID impairment” OR “post COVID syndrome” OR “post-acute COVID syndrome” OR “post-acute COVID-19” OR “post-acute COVID-19 fatigue” OR “post-acute COVID-19 neurological syndrome” OR “post-acute sequelae of SARS-CoV-2 infection” OR “post-acute COVID19 syndrome”)</p> <p><b>AND</b></p> <p>(Rehab* OR “Activities of Daily Living” OR “ADL” OR “Animal Assisted Therapy” OR “Equine Assisted Therapy” OR “Art Therapy” OR Bibliotherapy OR “Correction of Hearing Impairment” OR Lipreading OR “Manual Communication” OR “Dance Therapy” OR “Early Ambulation” OR “Exercise Therapy” OR “Endurance Training” OR “Muscle Stretching Exercises” OR “Plyometric Exercise” OR “Resistance Training” OR “Music Therapy” OR “Occupational Therapy” OR “Recreation Therapy” OR “Language Therapy” OR “Myofunctional Therapy” OR “Speech Therapy” OR “Voice Training” OR “Horticultural Therapy” OR Telerehabilitation OR “Physical Therapy Modalit*” OR “Electric Stimulation Therapy” OR “Extracorporeal Shockwave Therapy” OR Hydrotherapy OR “Musculoskeletal Manipulations” OR “functional status” OR “Self care” OR Habilitation OR “functional readaptation” OR “medical rehabilitation” OR readaption OR readjustment OR resocialization OR “revalidation” OR rejuvenation OR “self report” OR “sensorimotor integration” OR “mirror therapy”)</p> |
| <b>International Clinical Trials Registry Platform (WHO)</b>                                     | <p>“LONG COVID” AND “REHABILITATION”</p>                                                                                                                                                                                                                                                                                                                                                                                                                                                                                                                                                                                                                                                                                                                                                                                                                                                                                                                                                                                                                                                                                                                                                                                                                                                                                                                                                                                                                                                                                                                                                                                                                |

SUPPLEMENTARY

TABLES

**Table S1.** Characteristics of the experimental interventions and controls

| Study                   | Sample            | Intervention                                                                                                                                                               |                                                                                                                                                                                                                | Frequency<br>(times/wks) | Session<br>Length | Program<br>Duration | Setting            | Modality               |
|-------------------------|-------------------|----------------------------------------------------------------------------------------------------------------------------------------------------------------------------|----------------------------------------------------------------------------------------------------------------------------------------------------------------------------------------------------------------|--------------------------|-------------------|---------------------|--------------------|------------------------|
|                         |                   | Control                                                                                                                                                                    | Experimental                                                                                                                                                                                                   |                          |                   |                     |                    |                        |
| Li et al.,<br>2021      | EG: 59<br>CG: 61  |                                                                                                                                                                            | Unsupervised home-based exercise programme comprising breathing control and thoracic expansion, aerobic exercise and LMS exercise, delivered via smartphone, and remotely monitored with heart rate telemetry. | 3-4                      | 40-60 min         | 6 wks               | Home-based via App | Un-Supervised          |
|                         |                   | Short educational instructions at baseline                                                                                                                                 |                                                                                                                                                                                                                | -                        | -                 | -                   | -                  | -                      |
| Nambi et al., 2022      | EG: 38<br>CG: 38  | Supervised 30 minutes of Low intensity aerobic training (40%–60% max HR) in an exercises program including 15 min warm up, 30 min resistance training and 15 min cool down | Supervised 30 minutes of High intensity aerobic training (60% - 80% max HR) in an exercises program including 15 min warm up, 30 min resistance training and 15 min cool down                                  | 4                        | 90 min            | 8 wks               | Pt Department      | Supervised In presence |
| Srinivasan et al., 2021 | EG: 24<br>CG: 24  |                                                                                                                                                                            | Pursed lip breathing exercise with bhastrika pranayama                                                                                                                                                         | 21<br>(thrice a day)     | 5 min             | 6 wks               | Home-based         | Un-Supervised          |
|                         |                   | Incentive spirometry                                                                                                                                                       |                                                                                                                                                                                                                | 21<br>(thrice a day)     | 5-10 reps         | 6 wks               | Home-based         | Un-Supervised          |
| Liu et al.,<br>2020     | EG: 38<br>CG: 38  |                                                                                                                                                                            | a) Respiratory muscle training; Cough exercise; Diaphragmatic training; Stretching exercise                                                                                                                    | 2                        | 10 min            | 6 wks               | -                  | -                      |
|                         |                   |                                                                                                                                                                            | b) Home exercise (pursed-lip breathing and coughing training)                                                                                                                                                  | 7                        | 30 sets           |                     |                    |                        |
|                         |                   | No rehabilitation intervention                                                                                                                                             |                                                                                                                                                                                                                | -                        | -                 | -                   | -                  | -                      |
| De Souza et al., 2021   | EG: 104<br>CG: 92 |                                                                                                                                                                            | Low-intensity Pulmonary Rehabilitation Program                                                                                                                                                                 | 1                        | ??                | 6 wks               | Home-based         | Video-conference       |
|                         |                   | Only drug intervention                                                                                                                                                     |                                                                                                                                                                                                                | ??                       | ??                | 6 wks               | -                  | -                      |

LMS lower-limb muscle strength; EG experimental group; CG control group; wks weeks; min minutes; HR heart rate; reps repetitions; HE Home Exercises.

**Table S2.** Outcome Measures Used in the Trials Included in the Review (**Primary** and Secondary)

| Study                   | Symptoms           |                   | Functional Outcomes                                  |                                                                                           |                              | Quality of Life and Independence Outcomes |
|-------------------------|--------------------|-------------------|------------------------------------------------------|-------------------------------------------------------------------------------------------|------------------------------|-------------------------------------------|
|                         | Fatigue & Dyspnoea | Mood Disturbances | Pulmonary Function                                   | Muscle Mass & Strength                                                                    | Functional Exercise Capacity |                                           |
| Li et al., 2021         | mMRC               | -                 | FEV1 (L), FVC (L), FEV1/FVC%, MVV (L/min), PEF (L/s) | Static Squat Test at the wall                                                             | 6MWT                         | SF-12                                     |
| Nambi et al., 2022      | -                  | TSK-11            | -                                                    | Handgrip strength;<br>Cross-sectional areas at MRI of biceps, quadriceps and calf muscles | -                            | SARQoL                                    |
| Srinivasan et al., 2021 | -                  | -                 | FVC, FEV1                                            | -                                                                                         | -                            | -                                         |
| Liu et al., 2020        |                    | SAS; SDS          | FEV1, FVC, FEV1/FVC ratio, DLCO                      |                                                                                           | 6MWT                         | SF-36, FIM                                |
| De Souza et al., 2021   | RPE                | -                 | -                                                    | -                                                                                         | STS, PADL                    | -                                         |

*mMRC* = modified British Medical Research Council dyspnoea score; *FEV1* = Forced Expiratory Volume in the 1st second; *FVC* = Forced Vital Capacity; *MVV* = Maximal Voluntary Ventilation; *PEF* = Peak expiratory flow; *6MWT* = 6 minutes walking test; *SF-12* Short Form Survey-12; *TSK-11* = Tampa scale of kinesiophobia; *SARQoL* = Sacopenia and Quality of Life; *RPE* = Rating of Perceived Exertion by the 10-points Borg Scale; *STS* = 30 seconds Sit to Stand Test; *PADL* = Physical Activity in Daily Live; *SAS* = Self Rating Anxiety Rate; *SDS* = Self Rating Depression Scale; *DLCO* = diffusing lung capacity for carbon monoxide; *SF-36* = Short Form Survey-36; *FIM* = Functional Independence Measure.
